# Supplementary material for: The role of T cell trafficking in CTLA-4 blockade-induced gut immunopathology
Source: PubMed Central journal article supplement (PMC7079427; doi:10.1186/s12915-020-00765-9), 2020-03-17

**a**

Gate on CD4+ subset

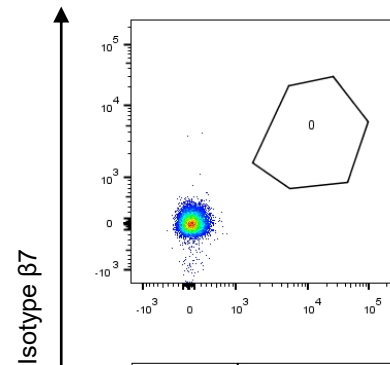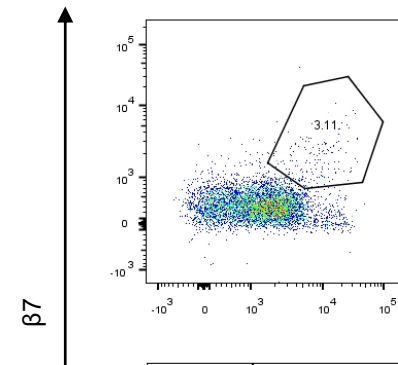

**b**

Gate on CD8+ subset

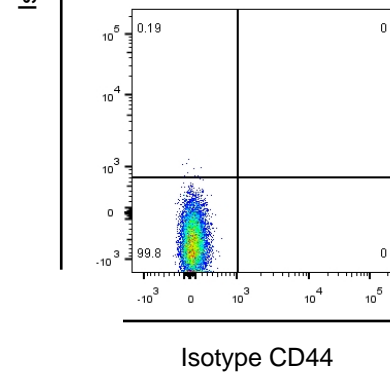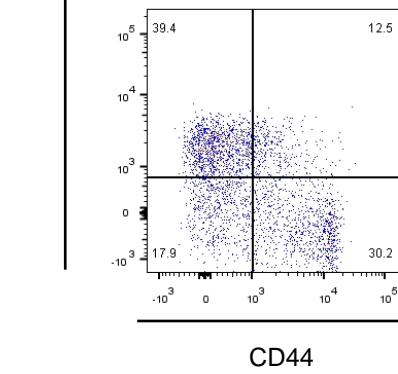

Supplement: 12915_2020_765_MOESM2_ESM.pdf [file 12915_2020_765_MOESM2_ESM.pdf]
